# Supplementary material for: Structural insights into protein-only RNase P complexed with tRNA
Source: PubMed Central journal article supplement — Nat Commun. 2013 Jan 15;4:1353–. doi: 10.1038/ncomms2358 (PMC3562450; doi:10.1038/ncomms2358), 2013-01-15
Supplement: ncomms2358-s1.pdf [file ncomms2358-s1.pdf]

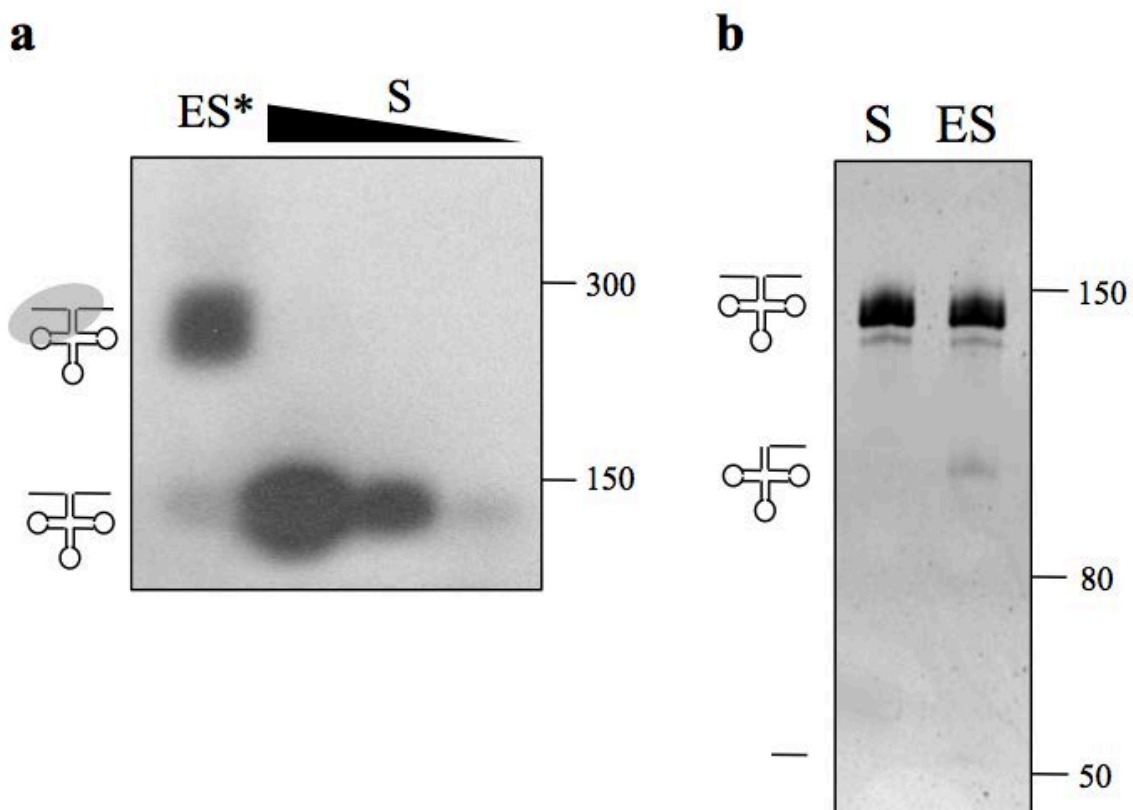

**Supplementary Figure S1. Analysis of the PRORP / tRNA complex used in the footprinting analysis.** (a) The crosslinked PRORP / tRNA complex (ES\*) was analysed on a denaturing polyacrylamide gel together with 1, 0.1 and 0.01 mg of free tRNA substrate (S). The ES\* sample revealed two bands corresponding to the higher molecular weight crosslinked complex and to residual free substrate. Band quantification showed that only 1% of the total signal was present as free substrate. (b) In order to show that the PRORP / tRNA complex analysed during footprinting experiments corresponds to a functional complex, a PRORP / tRNA sample in footprinting buffer (ES) was taken just prior to the crosslink step, incubated 15' at RT and analysed by denaturing PAGE. This revealed that RNase P cleavage had taken place and thus showed that the protein / tRNA complex used in the footprint analysis is an active complex. Molecular weight markers are indicated in nucleotides

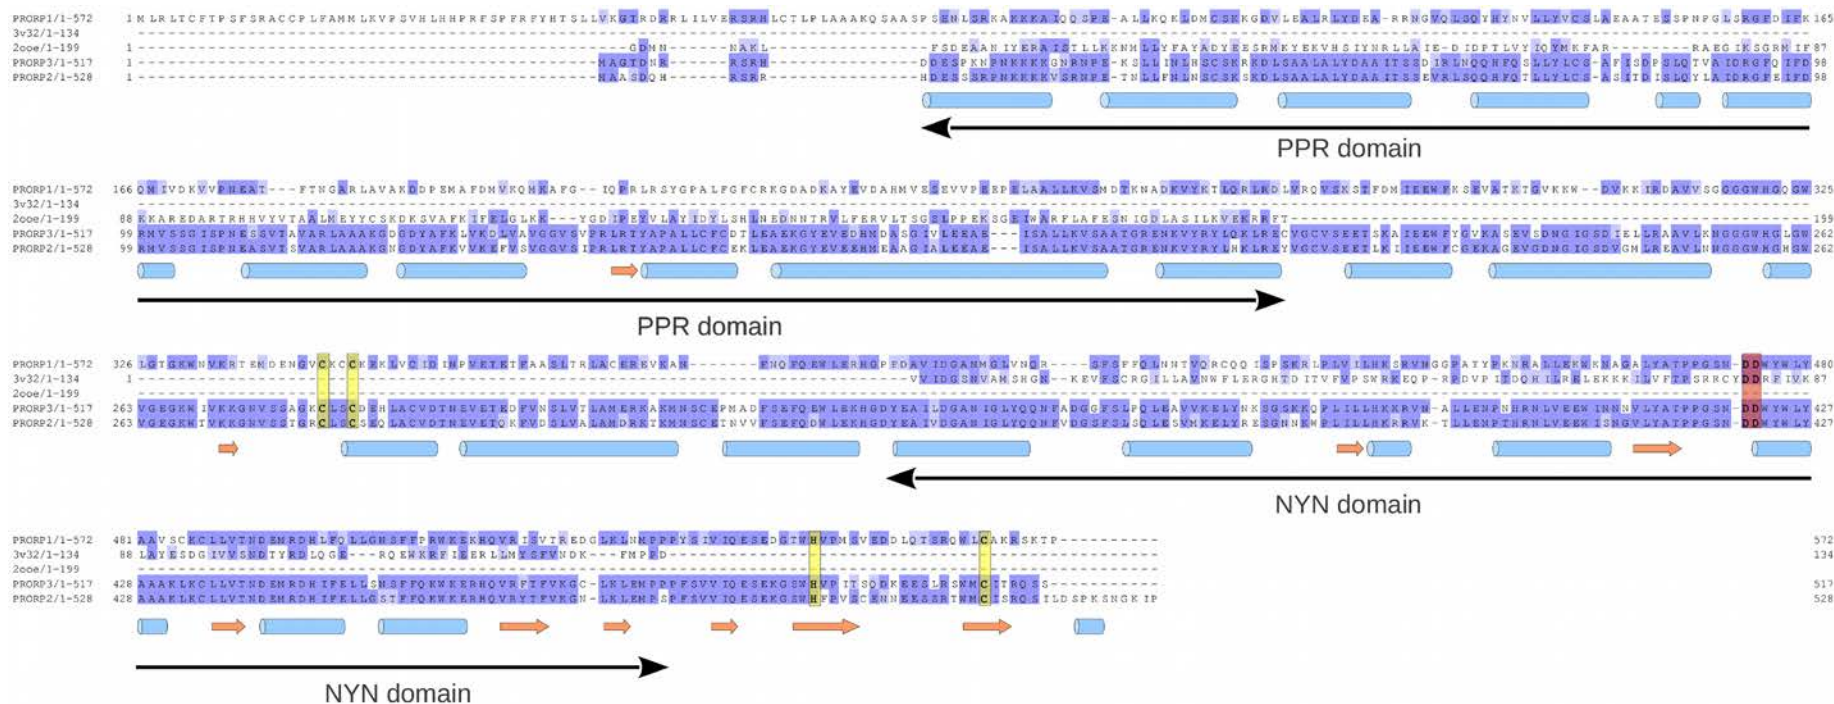

**Supplementary Figure S2** Alignment of PRORP 1-2-3 with template structures identified by Phyre2<sup>24</sup>. The best solution for the N-terminal PPR domain was the TPR domain of the murine cleavage stimulation factor (PDBid 2ooe; sequence identity of 10% with PRORP2; Phyre2 confidence score: 99.0%). The best solution for the C-terminal NYN domain was the catalytic domain of MCP1P1 RNase (PDB id 3v32; sequence identity with PRORP2: 25%; Phyre2 confidence score: 99.9%). Secondary structure predictions for PRORP2 are represented ( $\alpha$ -helices in blue,  $\beta$ -strands in orange). Zinc coordinating residues are highlighted in yellow and conserved catalytic aspartates in red.

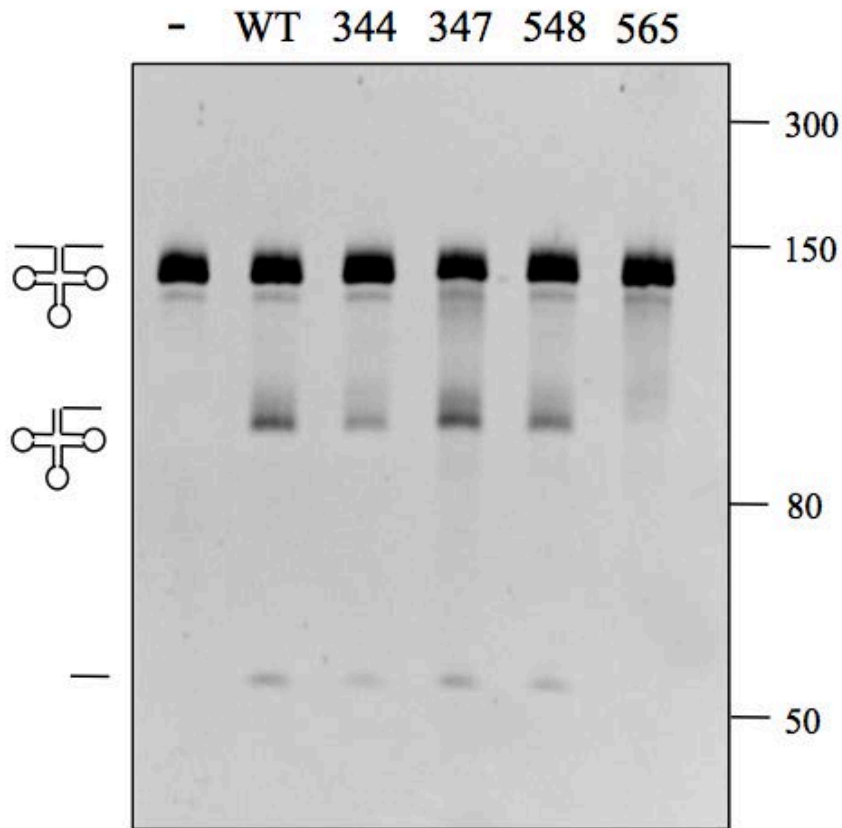

**Supplementary Figure S3. RNase P activity of zinc binding mutants.** Cleavage assays were carried out with PRORP proteins mutated at positions involved in zinc binding. Reactions were performed without protein (-), with wild type PRORP1 (WT), with point mutants C344A (344), C347A (347), H548A (548) and C565A (565). Apart from mutant 565, which also has the most reduced zinc content, all the other PRORP mutants had unaffected RNase P activity. Molecular weight markers are indicated in nucleotides.

**Supplementary Table S1. Oligonucleotides used for mutagenesis of tRNA and PRORP sequences.**

**Precursors of *Arabidopsis thaliana* mitochondrial tRNA Cys**

|                |                                      |
|----------------|--------------------------------------|
| ptrnCm_G1C_FW  | GGTGGCGGGTTTCGCTAGGTAACAT            |
| ptrnCm_G1C_RV  | ATGTTACCTAGCGAAACCCGCCACC            |
| ptrnCm_G18A_FW | GGCTAGGTAACATAATAGAAATGTATCGGACTGC   |
| ptrnCm_G18A_RV | GCAGTCCGATACATTTCTATTATGTTACCTAGCC   |
| ptrnCm_G18C_FW | GGCTAGGTAACATAATCGAAATGTATCGGACTG    |
| ptrnCm_G18C_RV | CAGTCCGATACATTTTCGATTATGTTACCTAGCC   |
| ptrnCm_G19A_FW | GGCTAGGTAACATAATGAAAATGTATCGGACTGC   |
| ptrnCm_G19A_RV | GCAGTCCGATACATTTTCATTATGTTACCTAGCC   |
| ptrnCm_G19C_FW | GCTAGGTAACATAATGCAAATGTATCGGACTGC    |
| ptrnCm_G19C_RV | GCAGTCCGATACATTTGCATTATGTTACCTAGC    |
| ptrnCm_G19U_FW | GGCTAGGTAACATAATGTAAATGTATCGGACTGC   |
| ptrnCm_G19U_RV | GCAGTCCGATACATTTACATTATGTTACCTAGCC   |
| ptrnCm_C56A_FW | CTGTAATGACGGTTAGACTCCGTCCTTGG        |
| ptrnCm_C56A_RV | CCAAGGACGGAGTCTAACCGTCATTACAG        |
| ptrnCm_C56G_FW | CTGTAATGACGGTTGGACTCCGTCCTTGG        |
| ptrnCm_C56G_RV | CAAGGACGGAGTCCAACCGTCATTACAG         |
| ptrnCm_G57A_FW | CTGTAATGACGGTTCAACTCCGTCCTTGGC       |
| ptrnCm_G57A_RV | GCCAAGGACGGAGTTGAACCGTCATTACAG       |
| ptrnCm_G57C_FW | CTGTAATGACGGTTCCACTCCGTCCTTGGC       |
| ptrnCm_G57C_RV | GCCAAGGACGGAGTGGAACCGTCATTACAG       |
| ptrnCm_C72G_FW | TCCGTCCTTGGCGTACACCTTCATG            |
| ptrnCm_C72G_RV | CATGAAGGTGTACGCCAAGGACGGA            |
| ptrnCm_MAC_FW  | ACCGTCATTATACATTTCCATTATGTTACCTAGCC  |
| ptrnCm_MAC_RV  | TGGAAATGTATAATGACGGTTCGACTCCGT       |
| ptrnCm_MDAC_FW | <b>CCGTCATTATACCTAGCCAAACCCGCCAC</b> |
| ptrnCm_MDAC_RV | <b>GGCTAGGTATAATGACGGTTCGACTCCGT</b> |

***Arabidopsis thaliana* PRORP1 cDNA**

|                   |                                                          |
|-------------------|----------------------------------------------------------|
| AtPRORP1_C344A_FW | CAGAGATGGATGAGAATGGTGTAGCTAAATGTTGCAAAGAGA<br>AGCTTG     |
| AtPRORP1_C344A_RV | CAAGCTTCTCTTTGCAACATTTAGCTACACCATTCTCATCCAT<br>CTCTG     |
| AtPRORP1_C347A_FW | GGATGAGAATGGTGTATGTAAATGTGCCAAAGAGAAGCTTGT<br>TTGTATTGAT |
| AtPRORP1_C347A_RV | ATCAATACAAACAAGCTTCTCTTTGGCACATTTACATACACCA<br>TTCTCATCC |
| AtPRORP1_H548A_FW | CTGAAGATGGAACCTGGGCTGTACCAATGAGCGTAG                     |
| AtPRORP1_H548A_RV | CTACGCTCATTGGTACAGCCAGGTTCCATCTTCAG                      |
| AtPRORP1_C565A_FW | CATCAAGGCAATGGTTAGCCGCAAAAAGATCCAAAAC                    |
| AtPRORP1_C565A_RV | GTTTTGGATCTTTTTGCGGCTAACCATTGCCTTGATG                    |

**Point mutations are indicated in bold.**
